# Supplementary material for: Effect of Environmental pH on the Mechanics of Chitin and Chitosan: A Single-Molecule Study
Source: MDPI journal article supplement (doi:10.3390/polym16070995), 2024-04-05
Supplement: s1 [file s1]

## Supporting Information

# Effect of Environmental pH on the Mechanics of Chitin and Chitosan: A Single-Molecule Study

Song Zhang \*, Yunxu Ji, Yiwei He, Juan Dong, Haohang Li and Shirui Yu \*

Department of Food Science and Engineering, Moutai Institute, Renhuai 564502, China; jiyunxu@mtxy.edu.cn (Y.J.); 18185657179@139.com (Y.H.); 18586724865@163.com (J.D.); lyz20180810lyz@163.com (H.L.)

\* Correspondence: zhangsong1@mtxy.edu.cn (S.Z.); yushirui@mtxy.edu.cn (S.Y.)

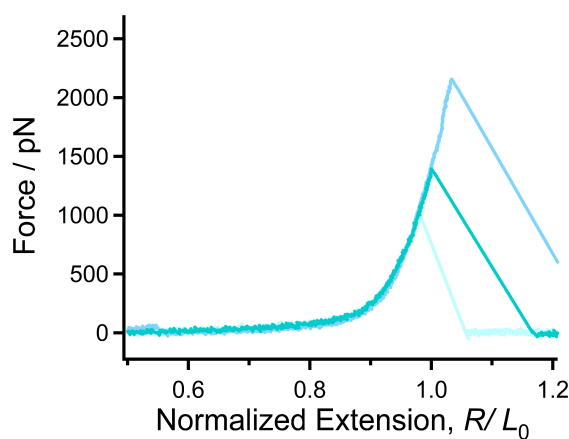

Figure S1 The typical F-E curves of chitin obtained in DMSO

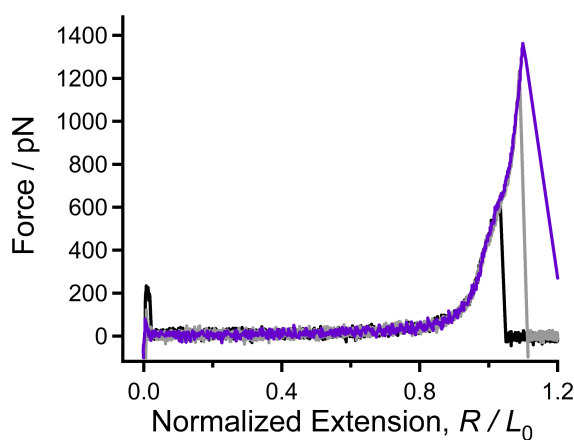

Figure S2 The normalized F-E curves of chitosan obtained in DI water

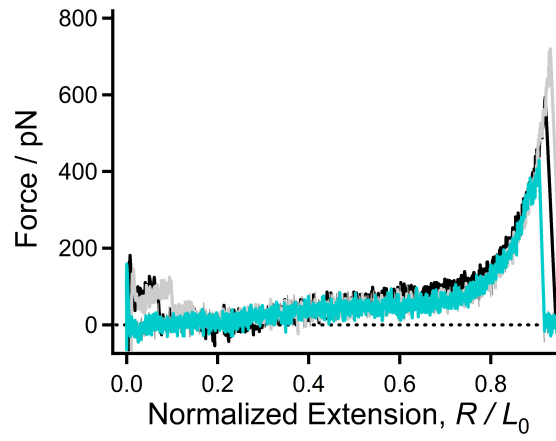

Figure S3 The normalized F-E curves of chitosan obtained under pH=9

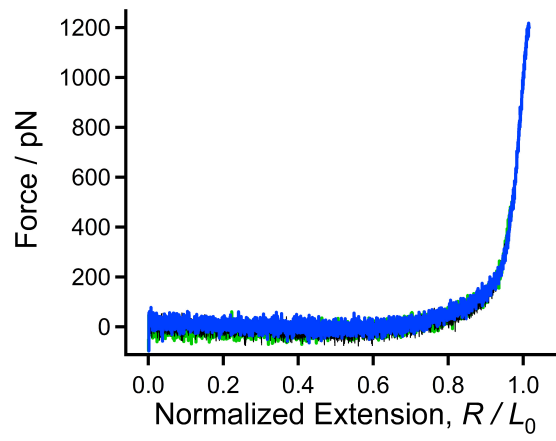

Figure S4 The normalized F-E curves of chitosan obtained under pH=11

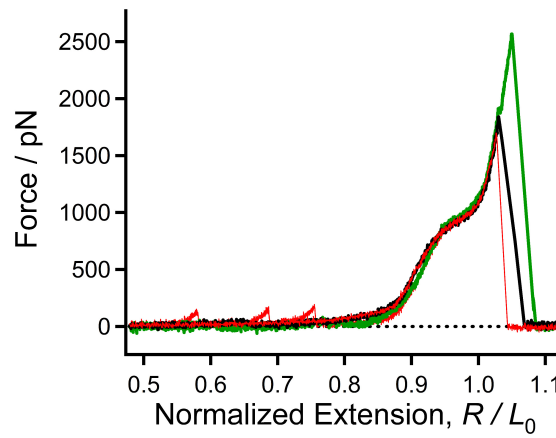

Figure S5 The normalized F-E curves of chitosan obtained under pH=5

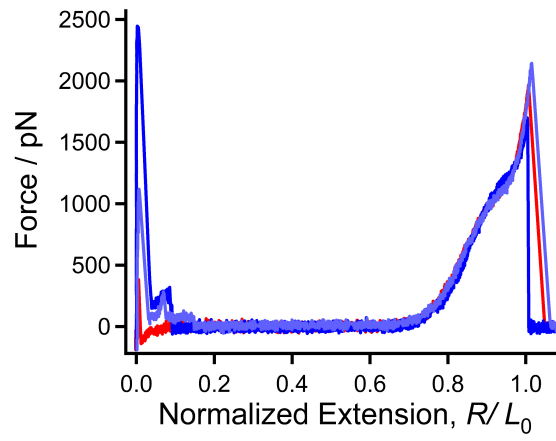

Figure S6 The normalized F-E curves of chitosan obtained under pH=3

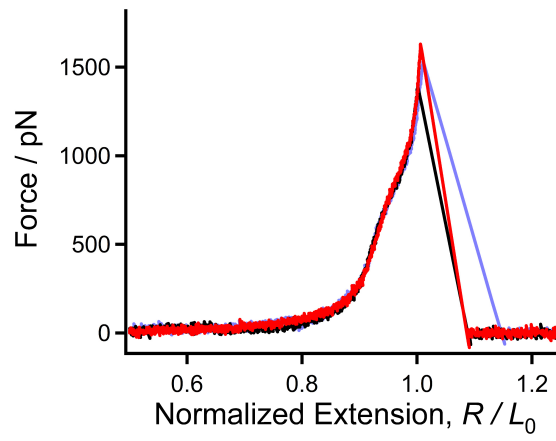

Figure S7 The normalized F-E curves of chitin obtained under pH= 9

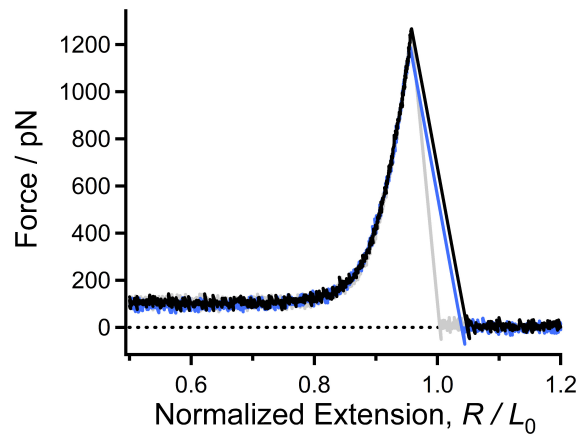

Figure S8 The normalized F-E curves of chitin obtained under pH= 11

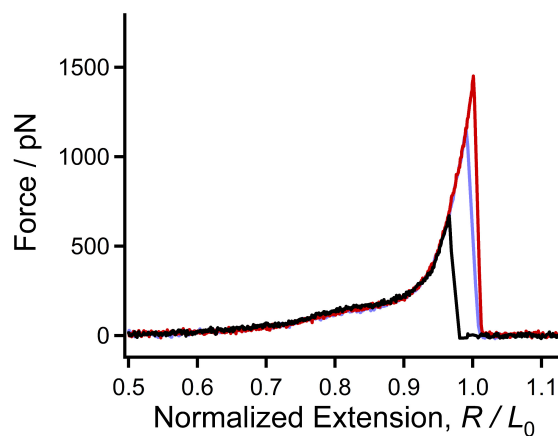

Figure S9 The normalized F-E curves of chitin obtained under pH= 5

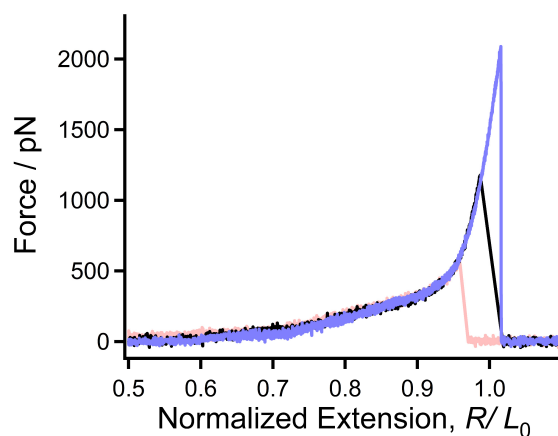

Figure S10 The normalized F-E curves of chitin obtained under pH= 3

Table S1 The theoretical elastic modulus of cellulose backbone calculated by Cui et al. [1].

| $\gamma_1$ | $\gamma_2$ | $\gamma_3$ |
|------------|------------|------------|
| 10.57 nN   | 90.23 nN   | -44.12 nN  |

#### Supporting References

1. Bao, Y.; Qian, H. J.; Lu, Z. Y.; Cui, S. Revealing the Hydrophobicity of Natural Cellulose by Single-Molecule Experiments. *Macromolecules* 2015, 48, 3685-3690.
